# Supplementary material
Source: bioRxiv or medRxiv preprint supplement (https://www.biorxiv.org/highwire/filestream/33616/field_highwire_adjunct_files/1/088740-2.pdf)
Supplement: Supplementary file [file 088740-2.pdf]

Leigh et al Supplementary Table 1

| Implementation | Dataset   | Operation | Pixeldata time (ms) | Pixeldata time std (ms) | Pixeldata relative performance | Pixeldata size (MiB) | Pixeldata rate (MiB/s) | Pixeldata rate std (MiB/s) | Metadata time (ms) | Metadata time std (ms) | Metadata relative performance | Metadata size (KB/s) | Metadata rate (MiB/s) | Metadata rate std (MiB/s) |
|----------------|-----------|-----------|---------------------|-------------------------|--------------------------------|----------------------|------------------------|----------------------------|--------------------|------------------------|-------------------------------|----------------------|-----------------------|---------------------------|
| C++/Linux      | tubhiswt  | read      | 383.5               | 13.86969434             | 8.609647979                    | 215                  | 560.6258149            | 20.27564196                | 106.5              | 4.893604849            | 4.536150235                   | 177                  | 1.623019366           | 0.074576671               |
| C++/Linux      | tubhiswt  | write     | 667.5               | 52.80301028             | 9.686441948                    | 215                  | 322.0973783            | 25.47971712                | 84                 | 5.0262469              | 13.6                          | 177                  | 2.057756696           | 0.123128491               |
| C++/Linux      | BBBC      | read      | 4514                | 122.0181177             | 23.5322109                     | 3456                 | 765.6180771            | 20.6954534                 | 1487.5             | 11.18033989            | 0.638554622                   | 2368                 | 1.554621849           | 0.011684841               |
| C++/Linux      | BBBC      | write     | 28063               | 2625.566806             | 2.603192816                    | 3456                 | 123.1514806            | 11.52201973                | 1417.5             | 38.2340438             | 1.948994709                   | 2368                 | 1.631393298           | 0.04400336                |
| C++/Linux      | MitoCheck | read      | 118                 | 6.958523739             | 10.72288136                    | 122                  | 1033.898305            | 60.96954153                | 2460.5             | 15.03504678            | 0.412334891                   | 3237                 | 1.28475221            | 0.007850563               |
| C++/Linux      | MitoCheck | write     | 188                 | 28.20974076             | 15.22101064                    | 122                  | 648.9361702            | 97.37404857                | 2240.5             | 60.30405415            | 2.524503459                   | 3237                 | 1.410905071           | 0.037975138               |
| C++/Windows    | tubhiswt  | read      | 743.85              | 11.01326951             | 4.438798145                    | 215                  | 289.0367682            | 4.279410937                | 176.4              | 1.846761034            | 2.738662132                   | 177                  | 0.979884141           | 0.010258571               |
| C++/Windows    | tubhiswt  | write     | 1821.45             | 16.06721081             | 3.549754317                    | 215                  | 118.037827             | 1.041224656                | 114.05             | 5.906953975            | 10.01665936                   | 177                  | 1.51557705            | 0.078495781               |
| C++/Windows    | BBBC      | read      | 11247               | 153.8940168             | 9.444687472                    | 3456                 | 307.2819419            | 4.204574761                | 2179.35            | 30.92652583            | 0.435840962                   | 2368                 | 1.061096198           | 0.015057709               |
| C++/Windows    | BBBC      | write     | 82947.8             | 614.1518413             | 0.880715341                    | 3456                 | 41.66475784            | 0.308489047                | 1451.8             | 18.76334613            | 1.902948064                   | 2368                 | 1.592850255           | 0.020586307               |
| C++/Windows    | MitoCheck | read      | 199.2               | 3.381061808             | 6.351907631                    | 122                  | 612.4497992            | 10.39523406                | 3368.1             | 62.71061356            | 0.301223242                   | 3237                 | 0.938550759           | 0.017474865               |
| C++/Windows    | MitoCheck | write     | 125.35              | 5.460624603             | 22.82848026                    | 122                  | 973.2748305            | 42.39879126                | 2507.05            | 16.69060561            | 2.256097804                   | 3237                 | 1.260897394           | 0.008394384               |
| JACE/Linux     | tubhiswt  | read      | 3662.5              | 119.2465381             | 0.901515358                    | 215                  | 58.70307167            | 1.911300497                | 607.5              | 9.10465468             | 0.795226337                   | 177                  | 0.284529321           | 0.004264265               |
| JACE/Linux     | tubhiswt  | write     | 41906               | 1044.178851             | 0.154290555                    | 215                  | 5.130530234            | 0.127838285                | 1157               | 16.57518754            | 0.987381158                   | 177                  | 0.149396338           | 0.002140253               |
| JACE/Linux     | BBBC      | read      | 107371.6667         | 835.6893362             | 0.989314996                    | 3456                 | 32.18726231            | 0.250518155                | 1063               | 30.10507913            | 0.893555974                   | 2368                 | 2.175446849           | 0.061610536               |
| JACE/Linux     | BBBC      | write     | 4262218.333         | 65908.98282             | 0.01713976                     | 3456                 | 0.81084537             | 0.01253854                 | 3349.5             | 36.19755735            | 0.824809673                   | 2368                 | 0.690401552           | 0.007461069               |
| JACE/Linux     | MitoCheck | read      | 1317                | 17.80005914             | 0.960744115                    | 122                  | 92.63477601            | 1.252015559                | 1231               | 8.522416262            | 0.824167344                   | 3237                 | 2.567938922           | 0.017778265               |
| JACE/Linux     | MitoCheck | write     | 5045                | 84.75972231             | 0.567205154                    | 122                  | 24.18235877            | 0.40628147                 | 8462.5             | 36.40054945            | 0.668378139                   | 3237                 | 0.373545975           | 0.001606769               |
| Java/Linux     | tubhiswt  | read      | 3301.8              | 62.29184284             | 1                              | 215                  | 65.11599733            | 1.228480063                | 483.1              | 6.56866565             | 1                             | 177                  | 0.357796652           | 0.004864928               |
| Java/Linux     | tubhiswt  | write     | 6465.7              | 70.90326991             | 1                              | 215                  | 33.2523934             | 0.364647822                | 1142.4             | 21.02229393            | 1                             | 177                  | 0.151305639           | 0.002784306               |
| Java/Linux     | BBBC      | read      | 106224.4            | 787.8960257             | 1                              | 3456                 | 32.53489782            | 0.241320419                | 949.85             | 17.39411576            | 1                             | 2368                 | 2.434594936           | 0.044583488               |
| Java/Linux     | BBBC      | write     | 73053.4             | 1160.302383             | 1                              | 3456                 | 47.30785973            | 0.751387648                | 2762.7             | 28.37734456            | 1                             | 2368                 | 0.837043472           | 0.008597774               |
| Java/Linux     | MitoCheck | read      | 1265.3              | 25.51181357             | 1                              | 122                  | 96.41982139            | 1.944080066                | 1014.55            | 16.33683278            | 1                             | 3237                 | 3.115797952           | 0.050172264               |
| Java/Linux     | MitoCheck | write     | 2861.55             | 25.41337195             | 1                              | 122                  | 42.63423669            | 0.378633857                | 5656.15            | 81.46699364            | 1                             | 3237                 | 0.58888419            | 0.00049754                |
| Java/Windows   | tubhiswt  | read      | 4804.6              | 38.72630005             | 0.687216418                    | 215                  | 44.74878242            | 0.360686587                | 547.7              | 2.451637476            | 0.882052218                   | 177                  | 0.31559533            | 0.001412681               |
| Java/Windows   | tubhiswt  | write     | 15550.95            | 517.3457029             | 0.415775242                    | 215                  | 13.82552191            | 0.459944528                | 1158.75            | 9.11259721             | 0.985889968                   | 177                  | 0.149170712           | 0.001173103               |
| Java/Windows   | BBBC      | read      | 159620.05           | 1850.068519             | 0.665482814                    | 3456                 | 21.65141535            | 0.250949689                | 986.55             | 8.042485869            | 0.962799655                   | 2368                 | 2.344027165           | 0.019108819               |
| Java/Windows   | BBBC      | write     | 171631.9            | 1142.012208             | 0.425639989                    | 3456                 | 20.13611689            | 0.133982618                | 3060.5             | 25.3988502             | 0.902695638                   | 2368                 | 0.755595491           | 0.006270134               |
| Java/Windows   | MitoCheck | read      | 1590.95             | 12.77116407             | 0.795310978                    | 122                  | 76.68374242            | 0.615569726                | 1167.3             | 4.780442613            | 0.869142466                   | 3237                 | 2.708072314           | 0.011090366               |
| Java/Windows   | MitoCheck | write     | 5940.4              | 2216.82752              | 0.481709986                    | 122                  | 20.53733755            | 7.664085764                | 6603.95            | 78.75309518            | 0.856479834                   | 3237                 | 0.478673038           | 0.005708248               |
